# Supplementary material for: Blautia coccoides JCM1395T Achieved Intratumoral Growth with Minimal Inflammation: Evidence for Live Bacterial Therapeutic Potential by an Optimized Sample Preparation and Colony PCR Method
Source: MDPI journal article supplement (doi:10.3390/pharmaceutics15030989), 2023-03-19
Supplement: s1 [file s1]

## Supplementary Fig. S1

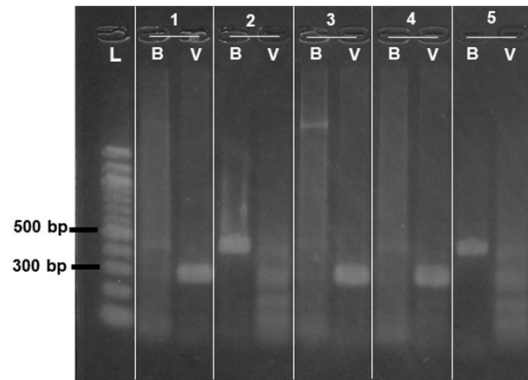

Agarose gel electrophoresis images with 16S rRNA gene PCR amplicons of five colonies picked from an agar plate seeded with a mixture of *B. coccoides* and *B. vulgatus*. PCR amplicons by primers corresponding to *B. coccoides* and *B. vulgatus* were loaded in lane B and lane V, respectively. The number in the figure indicates each colony.

## Supplementary Fig. S2

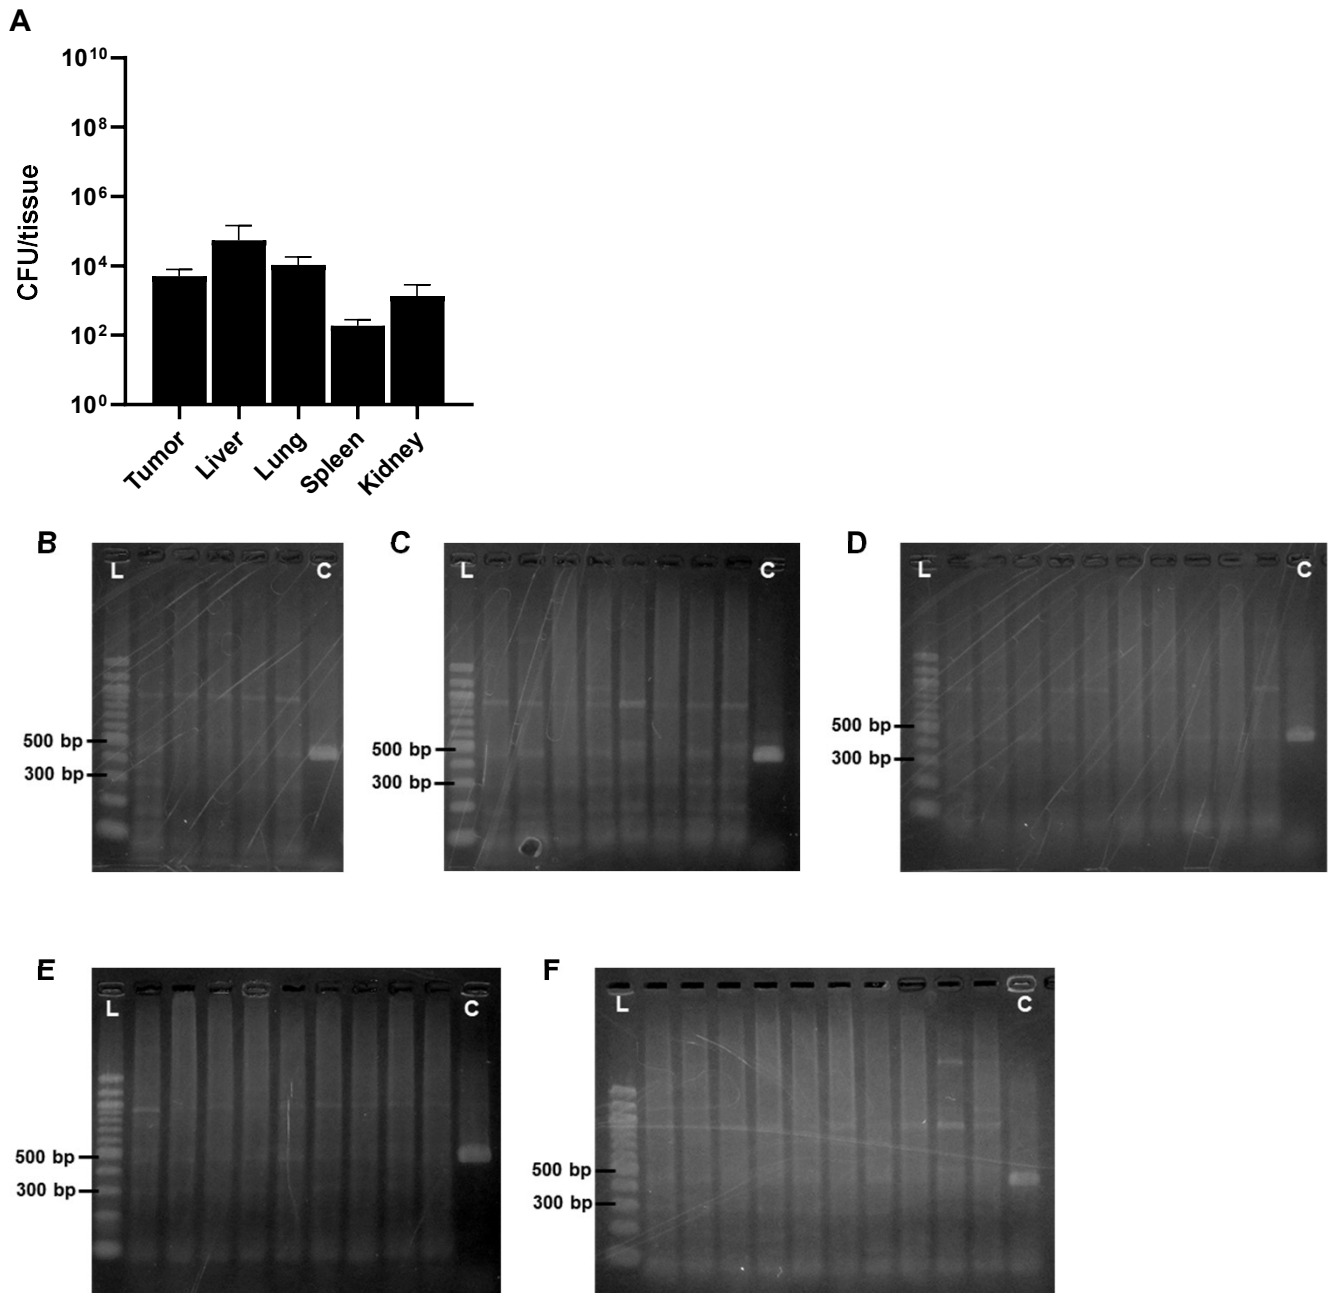

The number of anaerobic bacteria originally present in the tissues of tumor-bearing mice. (A) CFUs of bacteria on the agar plates seeded with homogenates of tumors and major organs and cultured anaerobically. Each value represents the mean  $\pm$  standard deviation (SD) ( $n = 3$ ). (B–F) SYBR® GREEN stained agarose gel electrophoresis images applied with 16S rRNA gene PCR amplicon by primers for *B. coccoides*. Colonies were picked from agar plates seeded with homogenates of (B) tumors ( $\times 10$  dilutions), (C) kidney ( $\times 10$  dilutions), (D) lung ( $\times 100$  dilutions), (E) liver ( $\times 100$  dilutions), and (F) spleen ( $\times 10$  dilutions). PCR amplicons of cultured *B. coccoides* were loaded in lane C as a positive control.

Supplementary Fig. S3

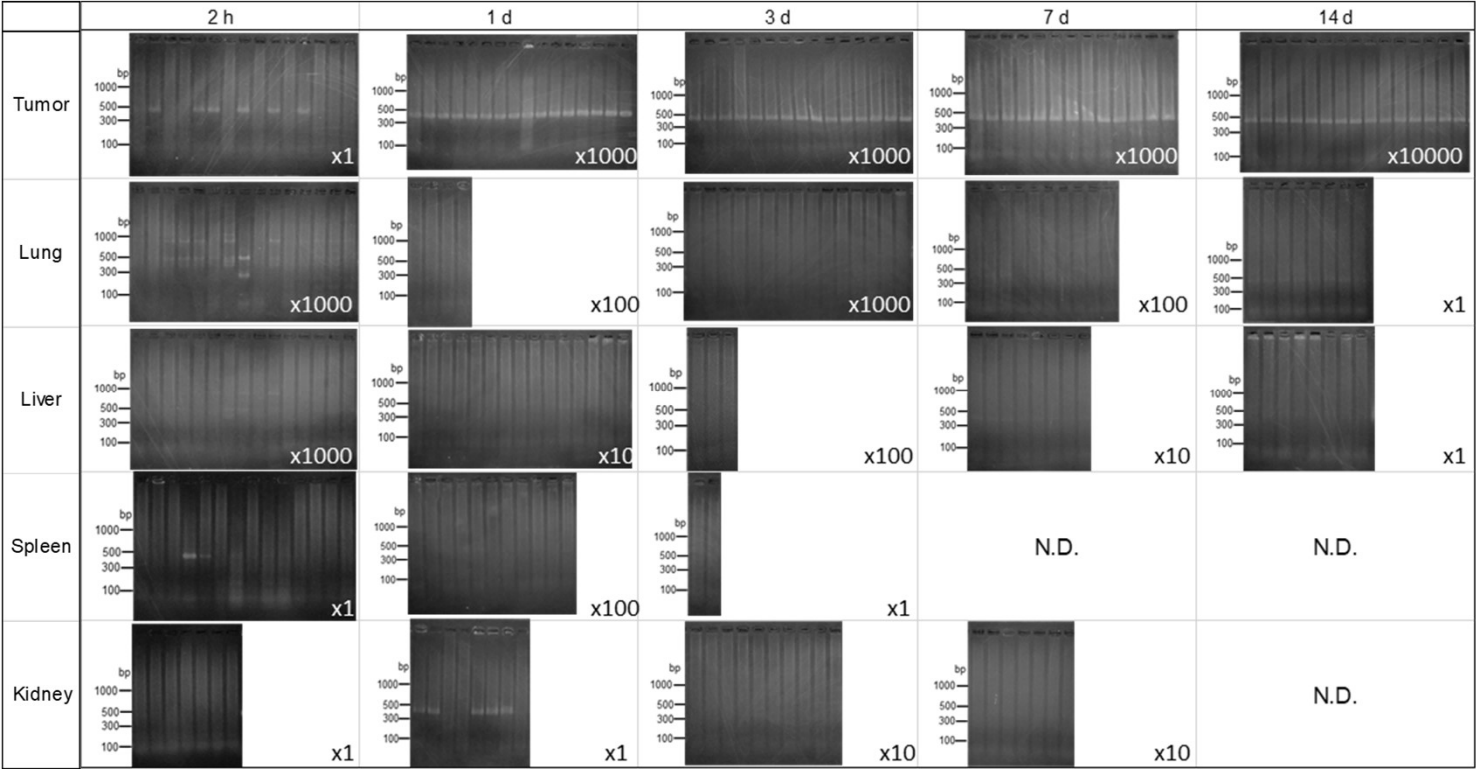

SYBR® GREEN stained agarose gel electrophoresis images of 16S rRNA gene PCR amplicons of colonies picked from agar plates seeded with diluted tissue homogenates. Tumors and tissues were extracted from colon-26 tumor-bearing mice receiving *B. coccoides* ( $1.5 \times 10^7$  CFU). The numbers at the bottom right indicate the dilution factor of the homogenate of each organ.
